# Supplementary material for: Smad2/3 Activation Regulates Smad1/5/8 Signaling via a Negative Feedback Loop to Inhibit 3T3-L1 Adipogenesis
Source: MDPI journal article supplement (doi:10.3390/ijms22168472), 2021-08-06
Supplement: s1 [file s1]

**Figure S1: TGFβ family gene expression in differentiating 3T3-L1 cells**

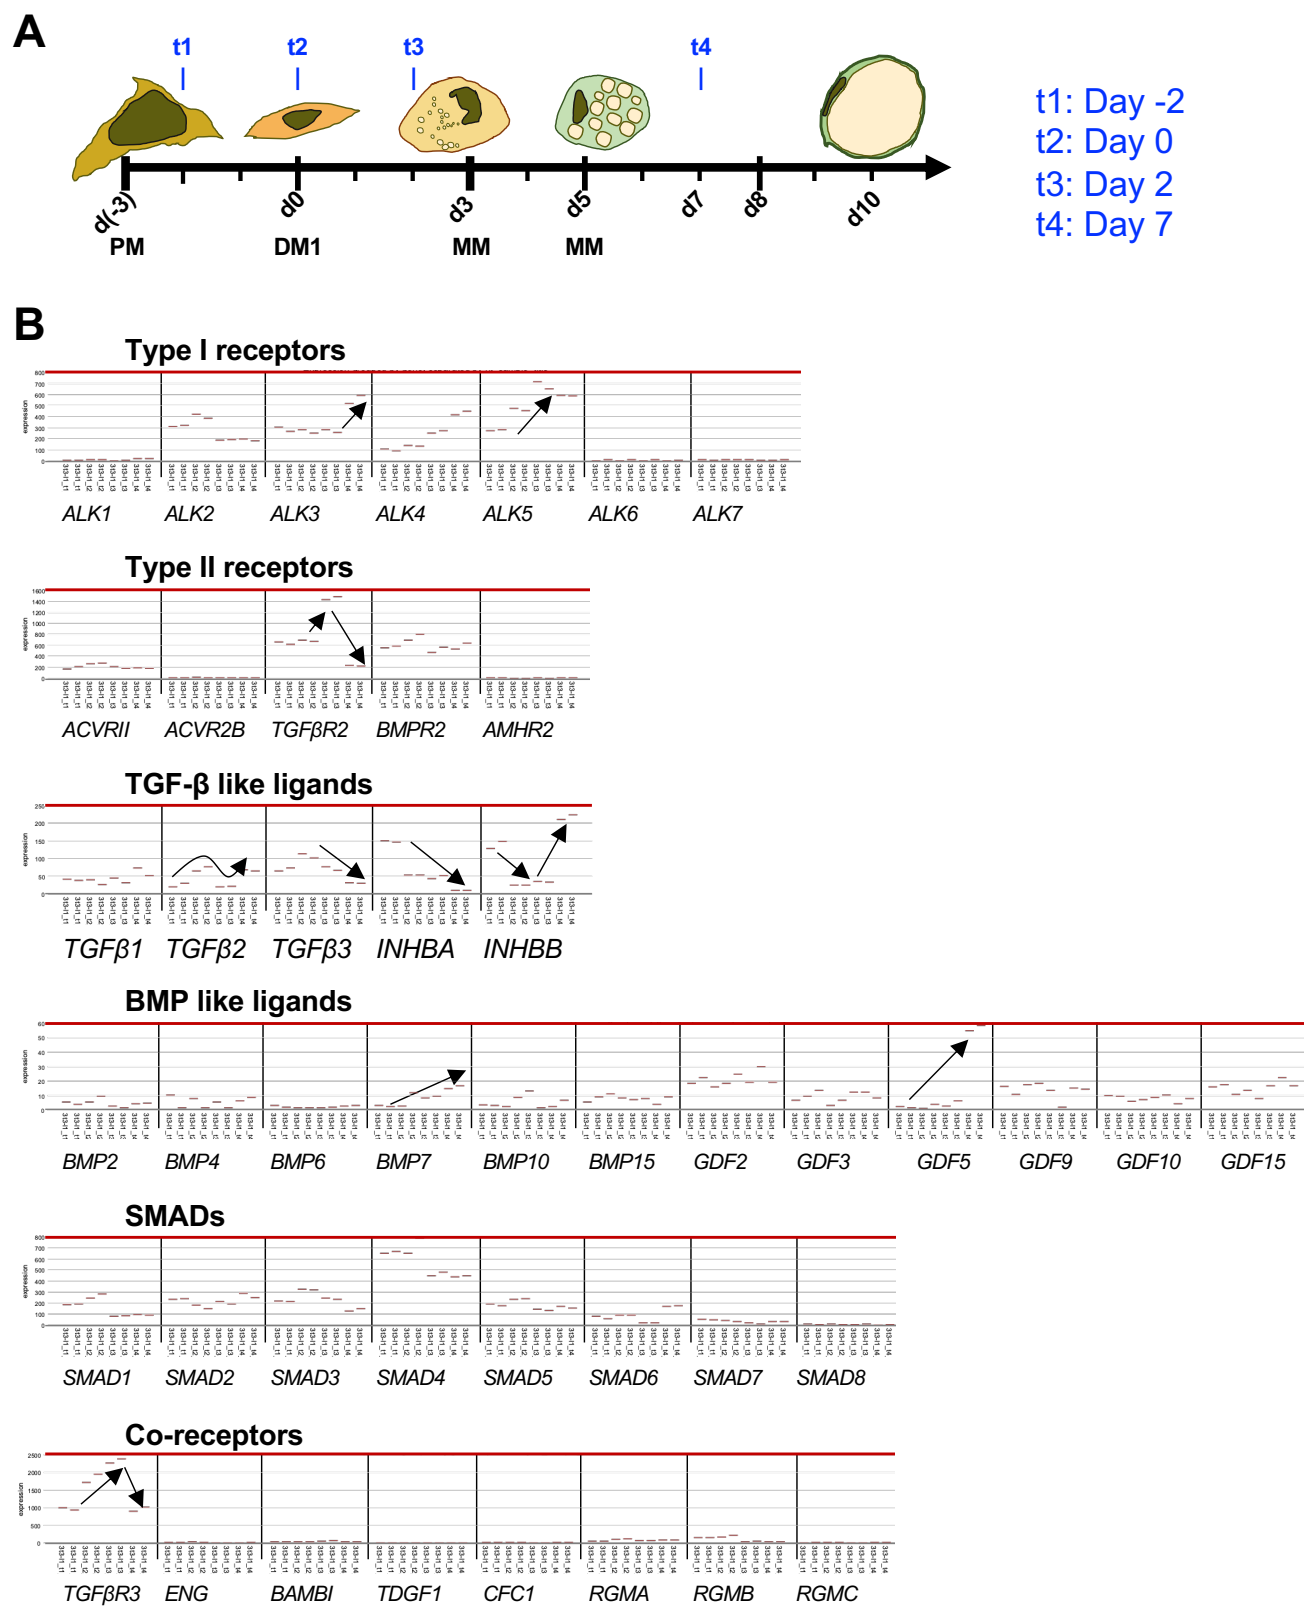

**A)** Gene expression analysis based on gse20696 data. Time points in study were taken on two days before differentiation medium (t1), during differentiation induction (t2), as well as two days (t3) and seventh days (t4) post differentiation. **(B)** The R2 web-based genomics analysis platform was used to analyze and display expression. Samples are separated by time point. Duplicate measurements are shown individually.

**Figure S2:** 3T3-L1 growth properties.

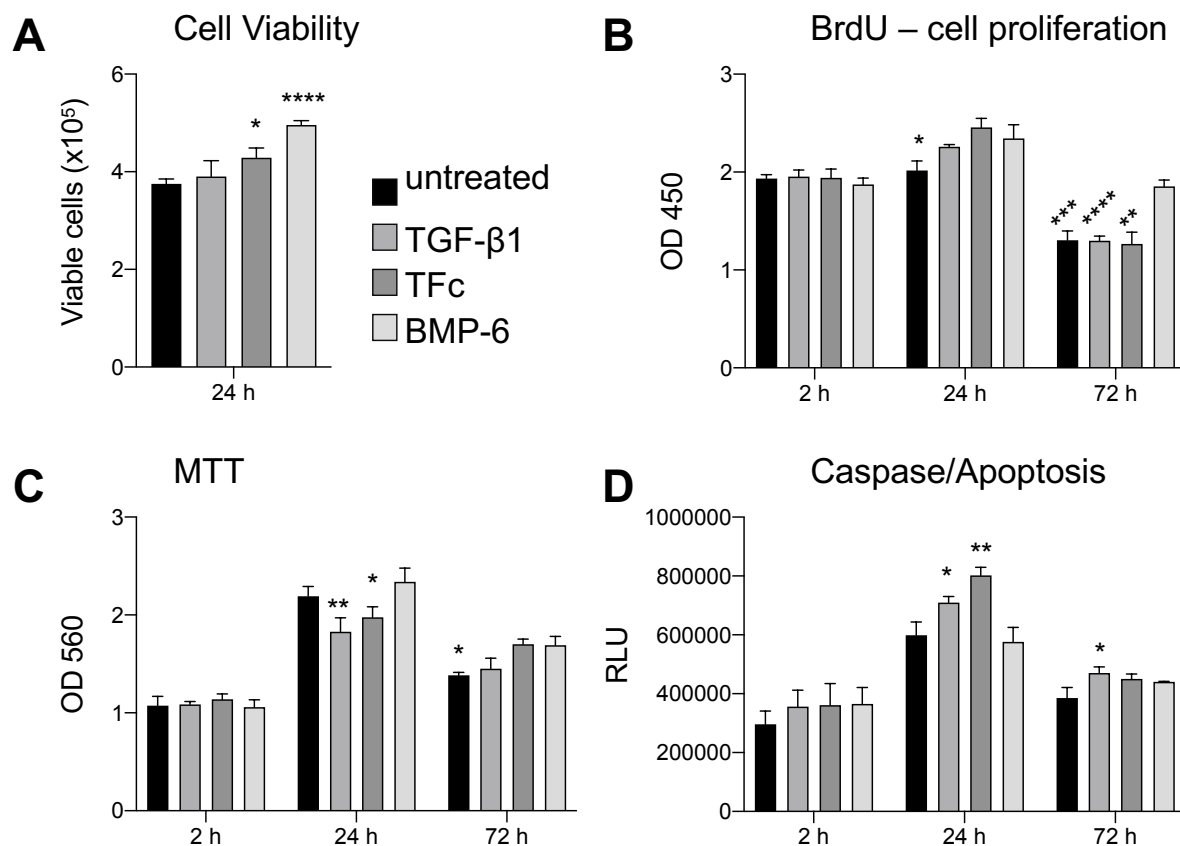

Experiments were carried out 2 hours, 24h hours or 72 hours post differentiation. Pre-adipocyte medium was changed at 0 hours into differentiation medium containing the control (black), TGF-β1 (medium grey), TGFβR2-Fc (TFc, dark grey) or BMP-6 (light grey). **(A)** Number of viable cells was determined at 24 hours post differentiation. **(B)** Apoptosis was measured using a fluorimetric Caspase-3 Immunoassay Kit. **(C)** cellular metabolic activity was measured using the MTT assay. **(D)** Proliferation was measured using a BrdU Cell Proliferation Assay. Statistical significance from four biological replicates was calculated by ordinary one-way ANOVA (Viability) and Bartlett's test or by Mixed-effects analysis and Tukey's multiple comparisons test (others) (\* p<0.05; \*\*p<0.01; \*\*\*p<0.001, \*\*\*\*p<0.0001 ). Reported statistical significance in A and B is relative to untreated controls (black). Reported statistical significance in C and D is relative to BMP-6 treated samples (light grey).

**Figure S3: SMAD phosphorylation sites**

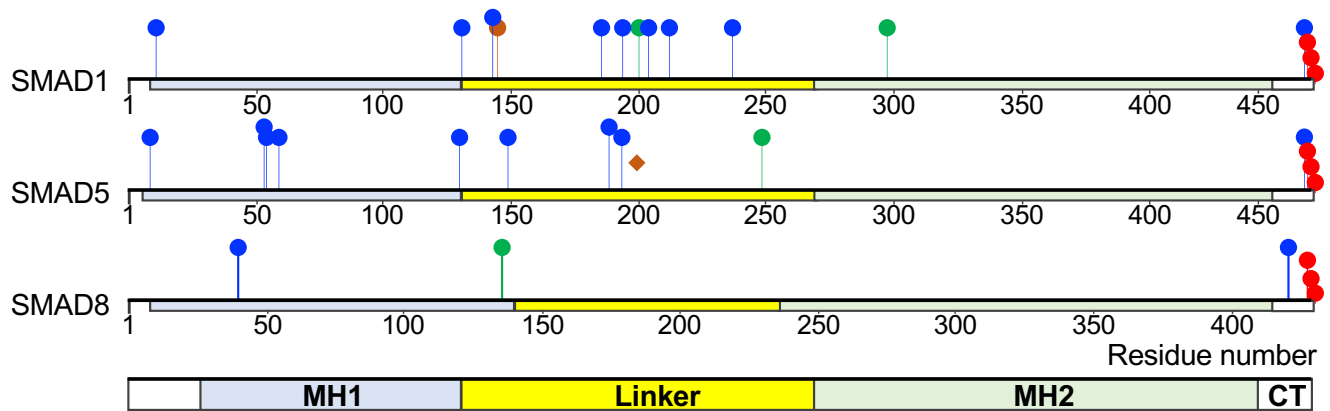

- MH stands for MAD homology and denotes a SMAD domain.
- Circles correspond to experimentally determined phosphorylation sites.
- Diamonds correspond to predicted sites (NetPhos 3.1 Server).
- Blue represents phosphorylated Serine residues.
- Green represents phosphorylated Threonine residues.
- Brown represents phosphorylated Tyrosine residues.
- Red represents C-terminal Serine residues phosphorylated in canonical TGF $\beta$  signal transduction.

**Figure S4:** Analysis of non-canonical pathway activation. Although several kinases may hyperphosphorylate SMADs at their interdomain linker region and ERK phosphorylation was increased when cell were treated with adipogenesis inhibitors, further analysis indicates that ERK kinase may not directly give rise to the p-SMAD1/5<sup>Hi</sup> species in this context.

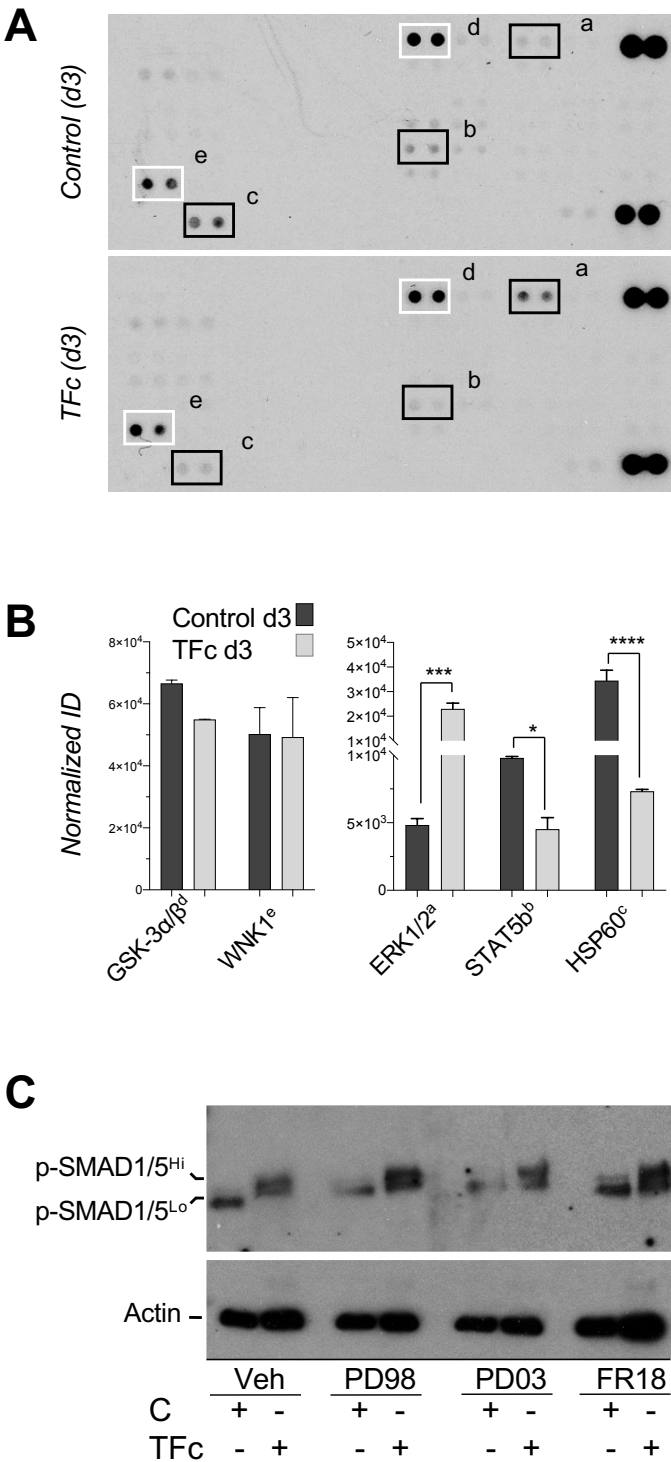

**A)** Analysis of kinase phosphorylation (Phospho-Kinase Array Kit, ARY003B) in Vehicle Control and TGFβRII-Fc treated samples collected at day 3 of differentiation. Black boxes represent proteins that are differentially phosphorylated between Control (C) and TGFβRII-Fc (TFc) treated samples. White boxes represent proteins that are phosphorylated in all 3T3-L1 samples. Box (a) corresponds to ERK1/2, box (b) to STAT5b, box (c) to HSP60, box (d) to GSK-3α/β and box (e) to WNK1. **(B)** Quantitative analysis of Kinase Array blots. Spot integrated densities were determined with ImageJ. Intensities were normalized against capture control antibody spots. Statistical significance from two biological replicates was determined by one-way ANOVA and Fisher's LSD tests (\* p<0.05; \*\*p<0.01; \*\*\*p<0.001) using GraphPad. **(C)** Effect of ERK inhibitors on SMAD1/5/8 hyperphosphorylation. Control (C) and TGFβRII-Fc (TFc) treated samples 3T3-L1 cells were simultaneously treated with vehicle (Veh, DMSO) or with the ERK inhibitors PD98059 (PD98, 1 μM), PD0325901 (PD03, 1 μM), and FR180204 (FR18, 10 μM). Equal amounts (10 μg) of protein from 3T3-L1 cells collected at day 3 of differentiation were analyzed by Western blot using a specific p-SMAD1/5/8 antibody. Actin loading controls are also shown (bottom panel). ERK inhibitors do not prevent formation of the p-SMAD1/5<sup>Hi</sup> form.

**Figure S5:** Dual SB43 and LDN treatment on 3T3-L1 differentiation.

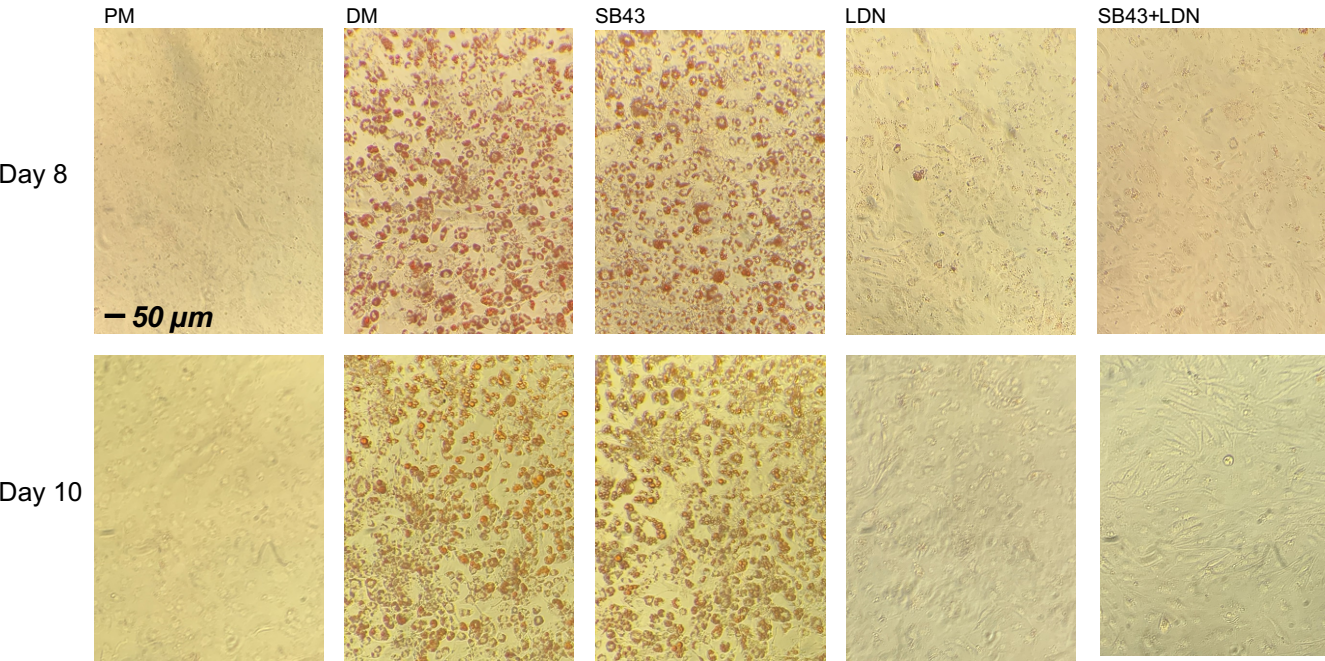

Oil-red-O images were taken at days 8 and 10 post differentiation. Undifferentiated cells (PM, pre-adipocyte medium), Differentiated Cells (DM, differentiation medium), as well as SB43, LDN and SB43+LDN treated cells in DM are shown.

**Table S1:** HUGO Gene nomenclature of TGF $\beta$  molecules

- ALK1: ACVRL1: activin A receptor like type 1
- ALK2: ACVR1: activin A receptor type 1
- ALK3: BMPR1A: bone morphogenetic protein receptor type 1A
- ALK4: ACVR1B: activin A receptor type 1B
- ALK5: TGFBR1: transforming growth factor beta receptor 1
- ALK6: BMPR1B: bone morphogenetic protein receptor type 1B
- ALK7: ACVR1C: activin A receptor type 1C
  
- ActRIIA: ACVR2A: activin A receptor type 2A
- ActRIIB: ACVR2B: activin A receptor type 2B
- BMPRII: BMPR2: bone morphogenetic protein receptor type 2
- TGF $\beta$ RII: TGFBR2: transforming growth factor beta receptor 2
- AMHRII: AMHR2: anti-Mullerian hormone receptor type 2
  
- Cripto-1: TDGF1: teratocarcinoma-derived growth factor 1
- Cryptic: CFC1B: cripto, FRL-1, cryptic family 1B
- Cerberus: CER1: cerberus 1, DAN family BMP antagonist
- BAMBI: BAMBI: BMP and activin membrane bound inhibitor

**Table S2:** Surface plasmon resonance (SPR) based binding constants ( $M^{-1}$ ) to Fc fusion ligand traps. Only the overall magnitude of the  $K_d$  value is shown.

| $K_d$          | BMPRII | ActRIIA | Bambi | ALK4 | ALK3 | ALK2 | Cerberus | Cripto | mCryptic | TGF $\beta$ RII | ActRIIB |
|----------------|--------|---------|-------|------|------|------|----------|--------|----------|-----------------|---------|
| Activin A      | -9     | -11     | NB    | -9   | NB   | NB   | NB       | NB     | NB       | NB              | -11     |
| Activin B      | -10    | -11     | -4*   | NB   | NB   | NB   | -11      | NB     | -9       | NB              | -12     |
| BMP-2          | NB     | NB      | NB    | NB   | -10* | NB   | -6       | NB     | NB       | NB              | NB      |
| BMP-4          | -9     | -9      | NB    | NB   | -10  | NB   | -9       | -9     | NB       | NB              | -9*     |
| BMP-6          | -8     | -8      | NB    | NB   | NB   | -7*  | -8       | NB     | NB       | NB              | -9      |
| BMP-7          | -8     | -9      | NB    | NB   | NB   | -7*  | -8       | NB     | NB       | NB              | -9      |
| BMP-9          | -9     | -9*     | NB    | NB   | NB   | -7*  | NB       | NB     | NB       | NB              | -10     |
| BMP-10         | -10    | -10     | NB    | NB   | NB   | NB   | NB       | NB     | NB       | NB              | -10     |
| GDF-8          | NB     | -9      | NB    | NB   | NB   | NB   | NB       | NB     | NB       | NB              | -9      |
| GDF-11         | -8     | -10     | NB    | -8   | NB   | NB   | -6       | NB     | NB       | NB              | -10     |
| GDF-3          | -9*    | -10*    | NB    | NB   | NB   | NB   | -7*      | -7     | NB       | NB              | -10*    |
| TGF- $\beta$ 1 | NB     | NB      | NB    | NB   | NB   | NB   | NB       | NB     | NB       | -9              | NB      |

- Starred values are the estimates from one ligand injection at 80 nM.
- All other values are derived from multiple injections and have been published.
- NB means 'no binding'.
- 300-350 RU of Fc fusion proteins were captured.
- 800 RU of ALK2-Fc was captured.

Fc fusion proteins were captured on the sensor chip using a human IgG1-Fc binding antibody. Ligands were injected over Fc fusion receptors.

**Table S3:** Antibodies used in this work

| Primary Antibody Name                 | Company        | Catalog Number | Antibody type |
|---------------------------------------|----------------|----------------|---------------|
| P-SMAD2 S465/467 138D4                | Cell Signaling | 3108           | mAb           |
| P-SMAD1/5 S463/465 41D10              | Cell Signaling | 9516           | mAb           |
| SMAD1 XP® D59D7                       | Cell Signaling | 12430          | mAb           |
| SMAD2 XP® D43B4                       | Cell Signaling | 5339           | mAb           |
| SMAD3 C67H9                           | Cell Signaling | 9523           | mAb           |
| SMAD5 D4G2                            | Cell Signaling | 12534          | mAb           |
| SMAD5 EP619Y                          | Abcam          | ab40771        | mAb           |
| SMAD8 (a.k.a. SMAD9)                  | Abcam          | ab48011        | polyclonal    |
| P-p44/42 MAPK T202/Y204 XP® D13.14.4E | Cell Signaling | 4370           | mAb           |
| P-p38 MAPK T180/Y182 XP® D3F9         | Cell Signaling | 4511           | mAb           |
| P-TAK1 T184/187 90C7                  | Cell Signaling | 4508           | mAb           |

| Secondary Antibody Name | Company        | Catalog Number |
|-------------------------|----------------|----------------|
| Anti-Rabbit             | Cell Signaling | 7074           |
| Anti-mouse              | R&D            | HAF018         |
| Anti-goat               | R&D            | HAF109         |
